# Supplementary material for: High dephospho-uncarboxylated matrix Gla protein concentrations, a plasma biomarker of vitamin K, in relation to frailty: the Longitudinal Aging Study Amsterdam
Source: Springer Nature journal article supplement (doi:10.1007/s00394-019-01984-9), 2019-05-08
Supplement: MOESM1 [file 16708896]

Supplemental table. Variables included in the LASA frailty index.

| **Deficit** | |
| --- | --- |
| Self-reported chronic conditions | |
|  | 1. Cardiac disease |
|  | 2. Peripheral arterial disease |
|  | 3. Stroke |
|  | 4. Diabetes |
|  | 5. Lung disease |
|  | 6. Cancer |
|  | 7. Arthritis |
|  | 8. Hypertension |
|  | 9. Other chronic disease 1 |
|  | 10. other chronic disease 2 |
|  | 11. Incontinence |
| Functional limitations | |
|  | 12. Walk up/down staircase 15 steps without resting |
|  | 13. Dess/undress self |
|  | 14. Sit down/stand up from chair |
|  | 15. Cut own toenails |
|  | 16. Walk outside 5 min without stopping |
|  | 17. Use of transportation |
| Self-rated health | |
|  | 18. How is your health in general? |
|  | 19. How is your health compared to other people of your age |
| CES-D depression scale | |
|  | 20. Feel depressed |
|  | 21. Feel everything is an effort |
|  | 22. Feel happy |
|  | 23. Feel lonely |
|  | 24. Enjoy life |
|  | 25. Could not get going |
| LASA physical activity questionnaire (LAPAQ) | |
|  | 26. Physical activity |
| Memory complaints | |
|  | 27. Self-reported memory complaints |
| Mini-Mental State Examination (MMSE) | |
|  | 28. Orientation time |
|  | 29. Orientation place |
|  | 30. Attention |
|  | 31. Recall |
| Physical performance | |
|  | 32. Gait speed (6 m) |
